# Supplementary material
Source: ML conference proceedings conference paper supplement (https://openaccess.thecvf.com/content/CVPR2024/html/Zhou_UltrAvatar_A_Realistic_CVPR_2024_paper.html)
Supplement: Supplementary file 2 [file Zhou_UltrAvatar_A_Realistic_CVPR_2024_supplemental.zip]

Archive with 3 entries (3 files):
- res_2.mp4
- 4206_supp.pdf
- res_1.mp4
